# Supplementary material for: Lung CAncer SCreening in French women using low-dose CT and Artificial intelligence for DEtection: the CASCADE study protocol
Source: PubMed Central journal article supplement — BMJ Open. 2022 Dec 8;12(12):e067263. doi: 10.1136/bmjopen-2022-067263 (PMC9743404; doi:10.1136/bmjopen-2022-067263), 2022-12-08

# BASELINE CT SOLID NODULES

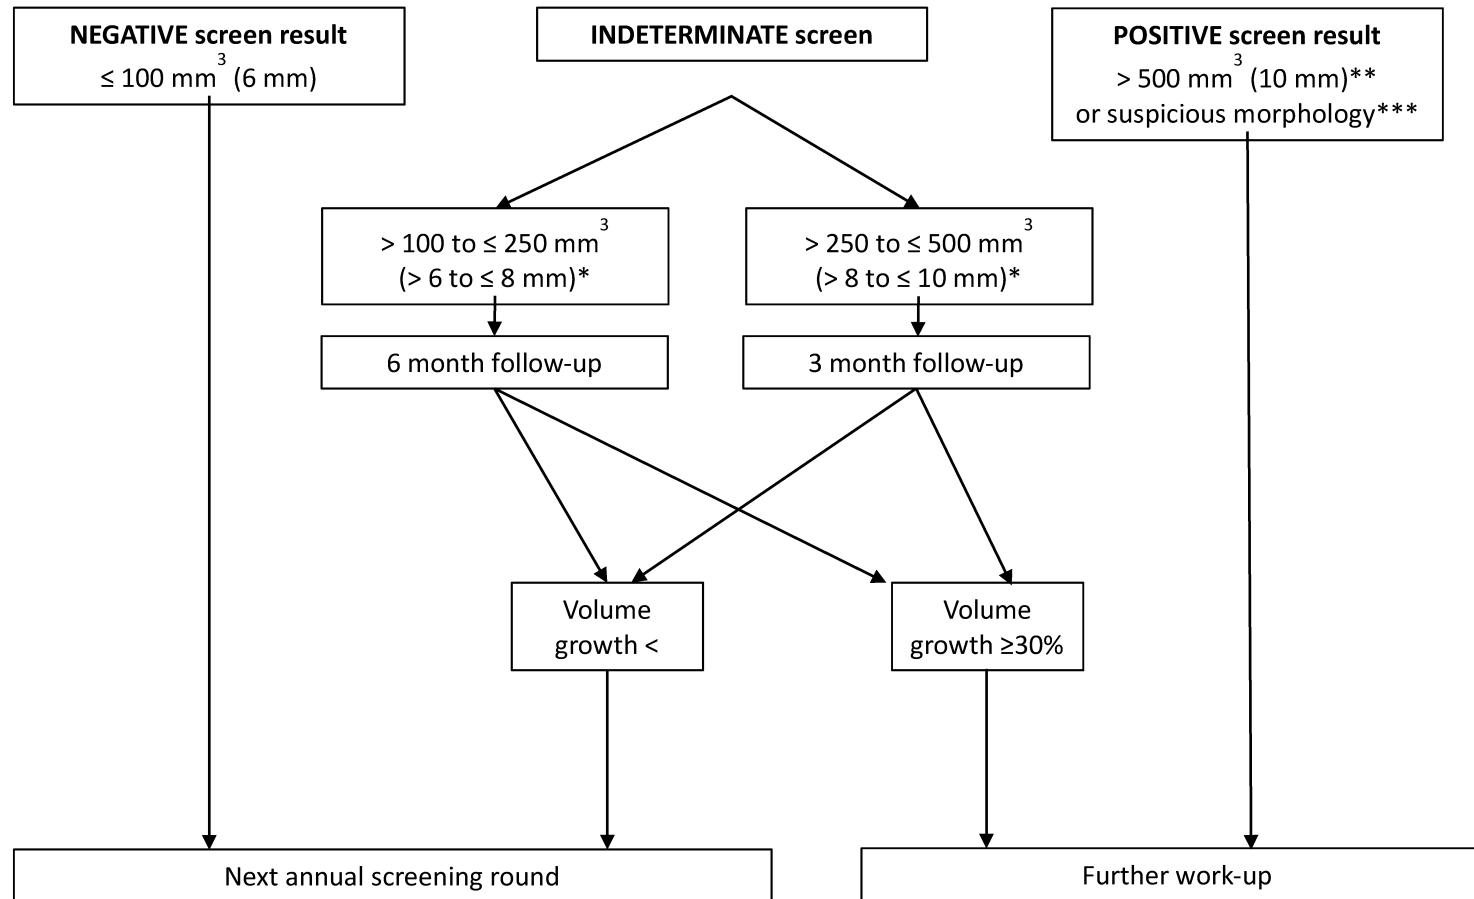

\* In case segmentation has failed

\*\* In case of a cystic airspace nodule, the solid portion should be taken into account

\*\*\* Pleural indentation, cystic component, air bronchogram or bubble like lucencies, spiculation

# BASELINE CT SUBSOLID NODULES

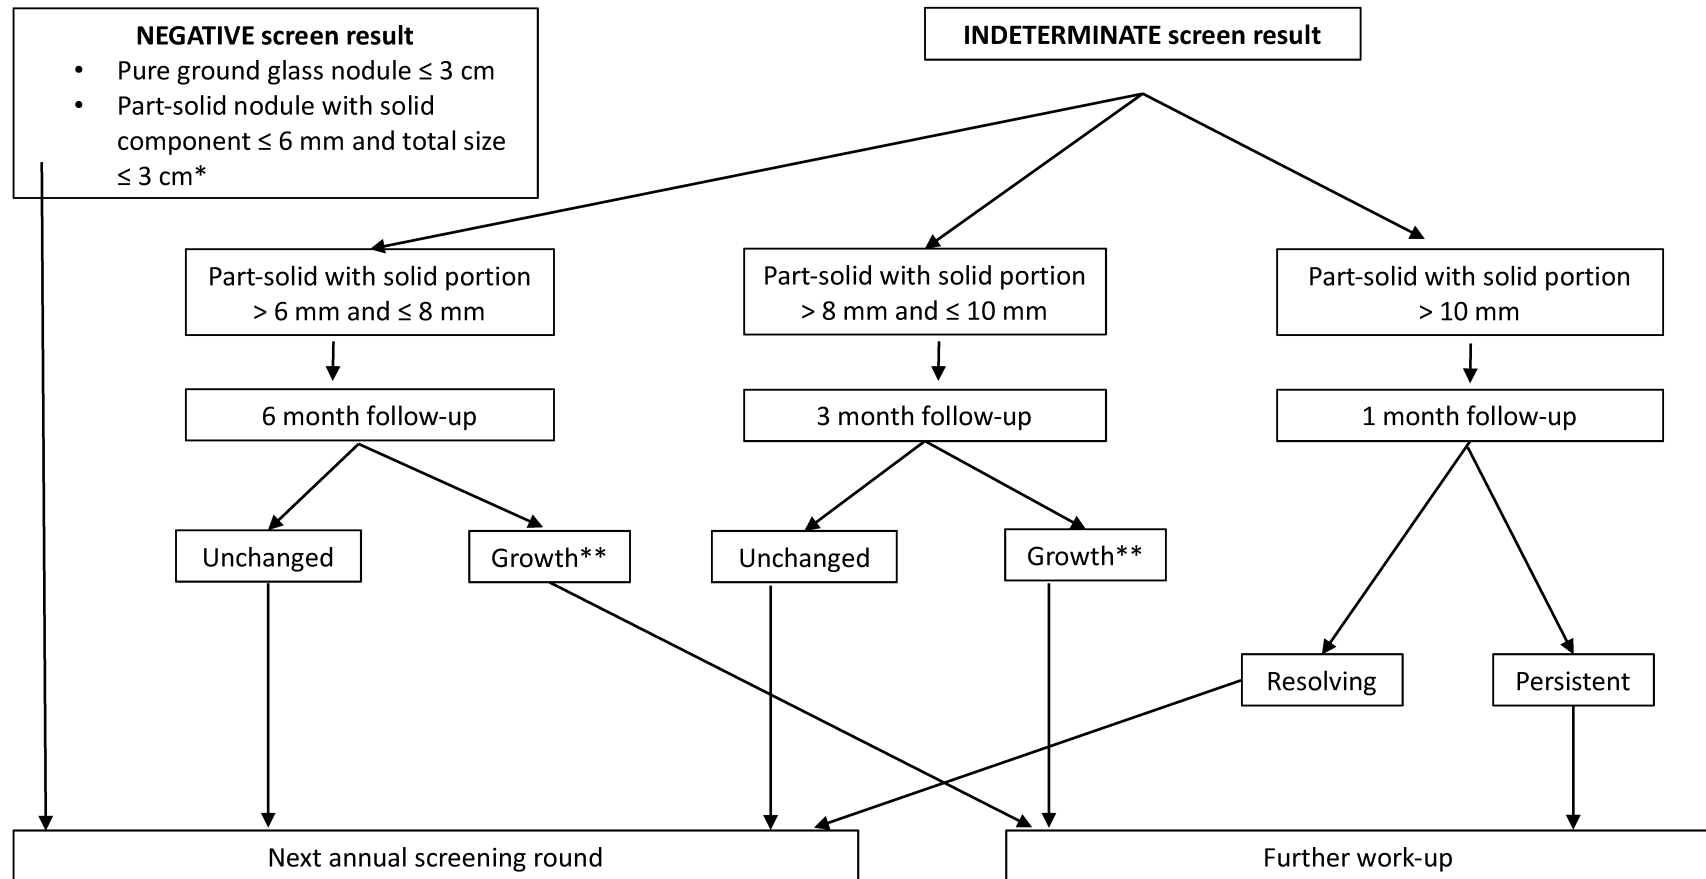

\* For part solid and GGN without morphological criteria suggesting malignancy (bubble like lucencies, border of bulla, pleural indentation)

\*\* Increase in solid portion of  $\geq 2$ mm, measured on lung window setting

# 1-YEAR FOLLOW-UP CT SOLID NODULES

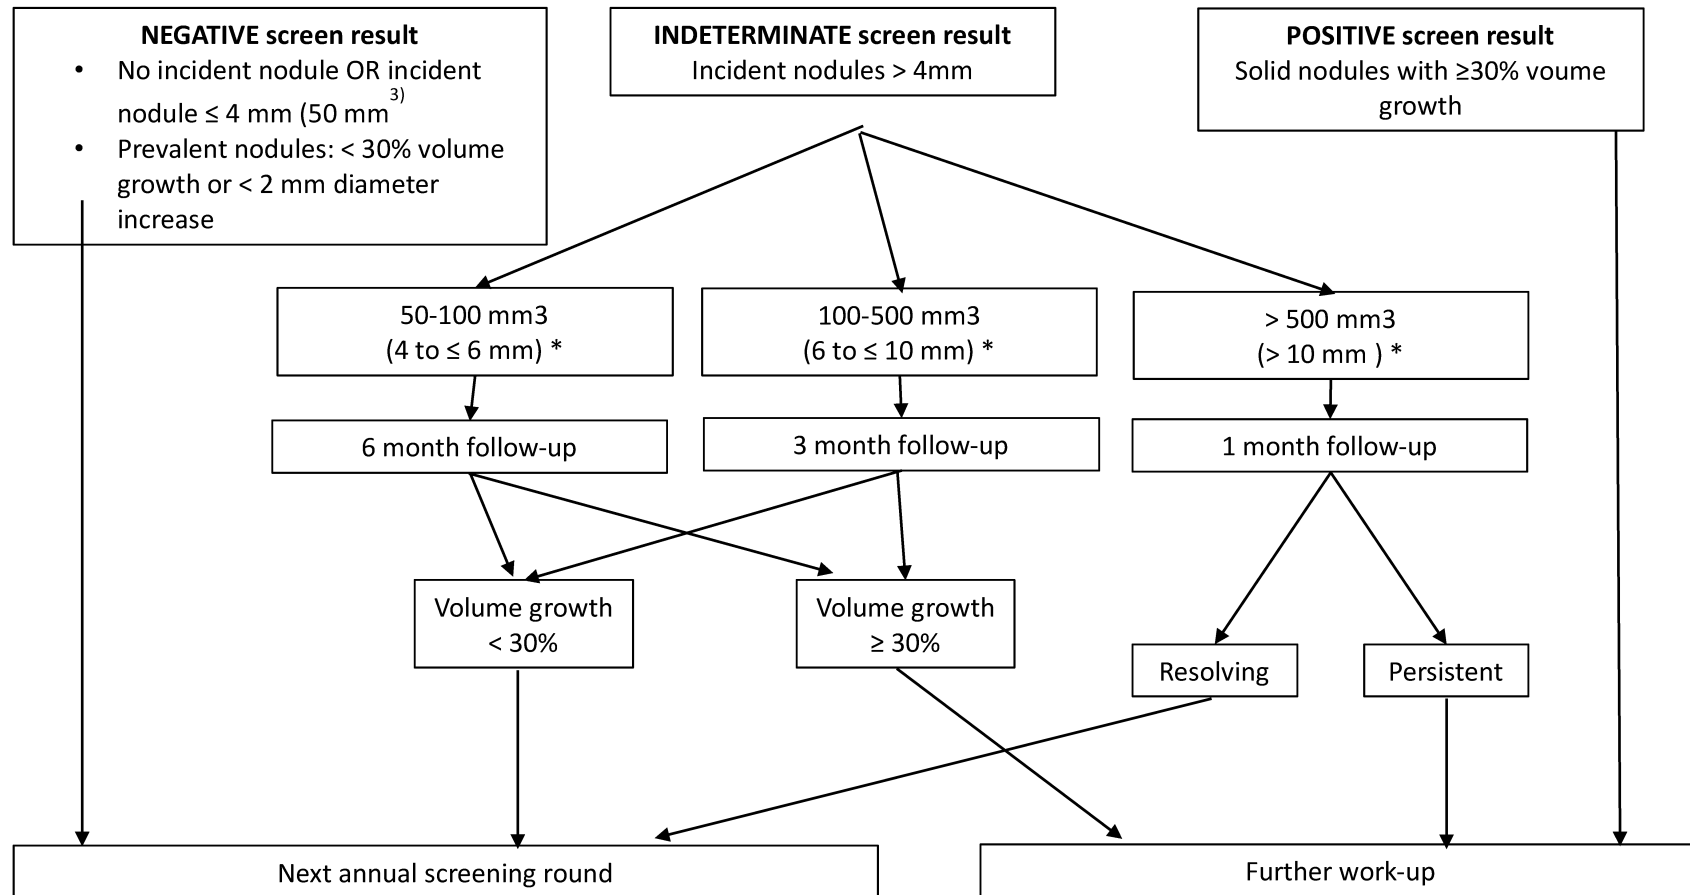

\* In case segmentation has failed

# 1-YEAR FOLLOW-UP CT SUBSOLID NODULES

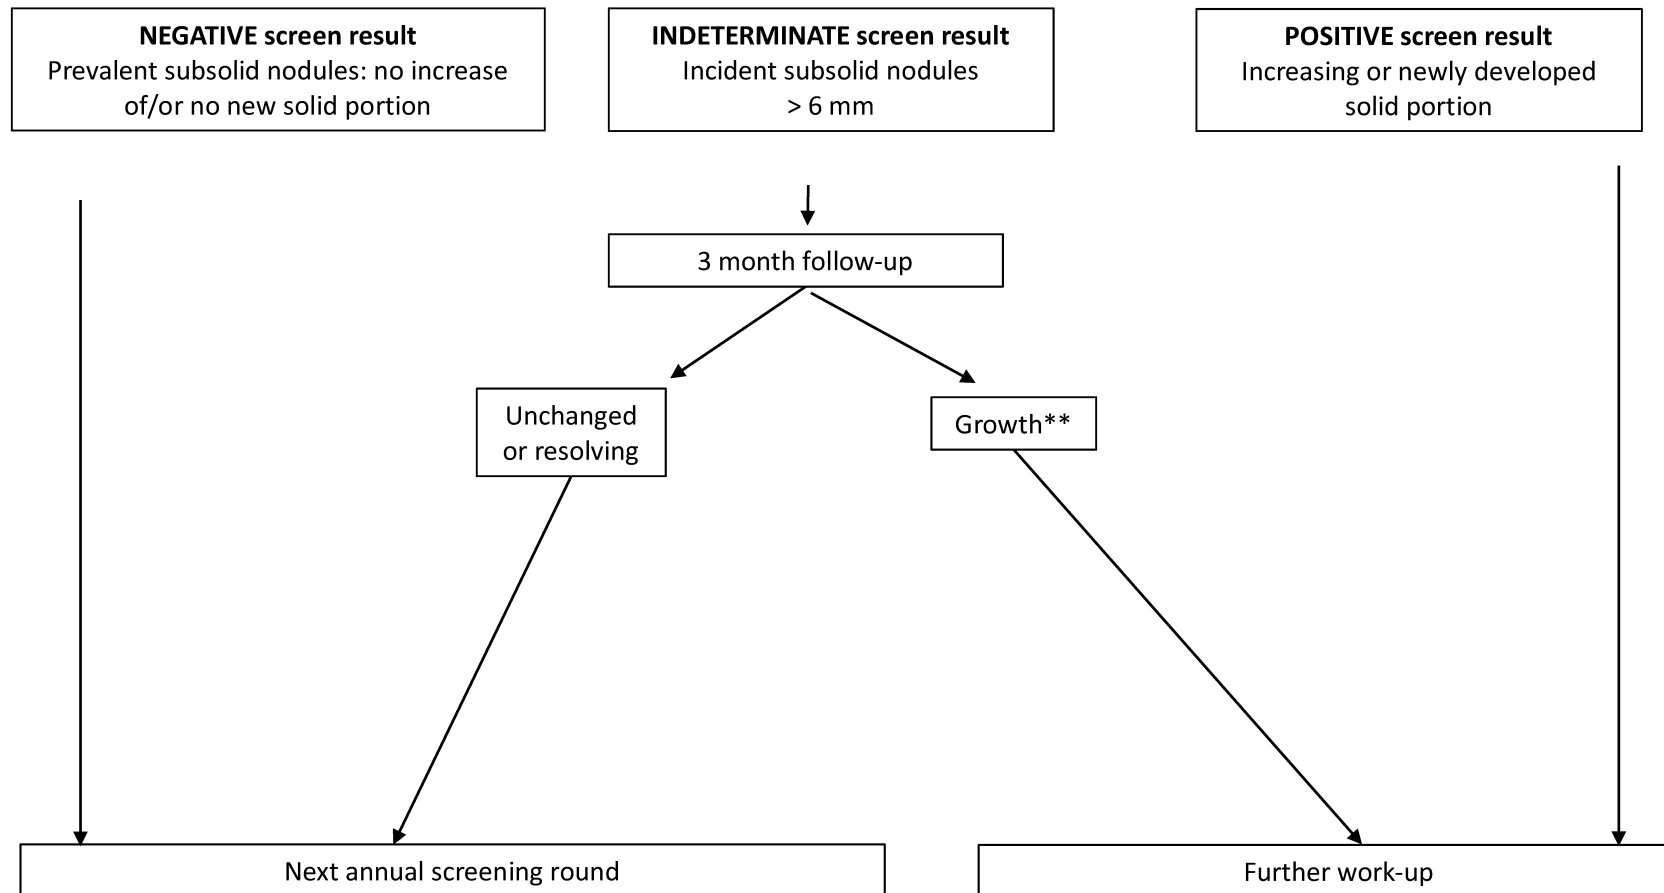

\* For part solid and GGN without morphological criteria suggesting malignancy (bubble like lucencies, border of bulla, pleural indentation)

\*\* Increase in solid portion of  $\geq 2$ mm, measured on lung window setting

## 2-YEAR FOLLOW-UP

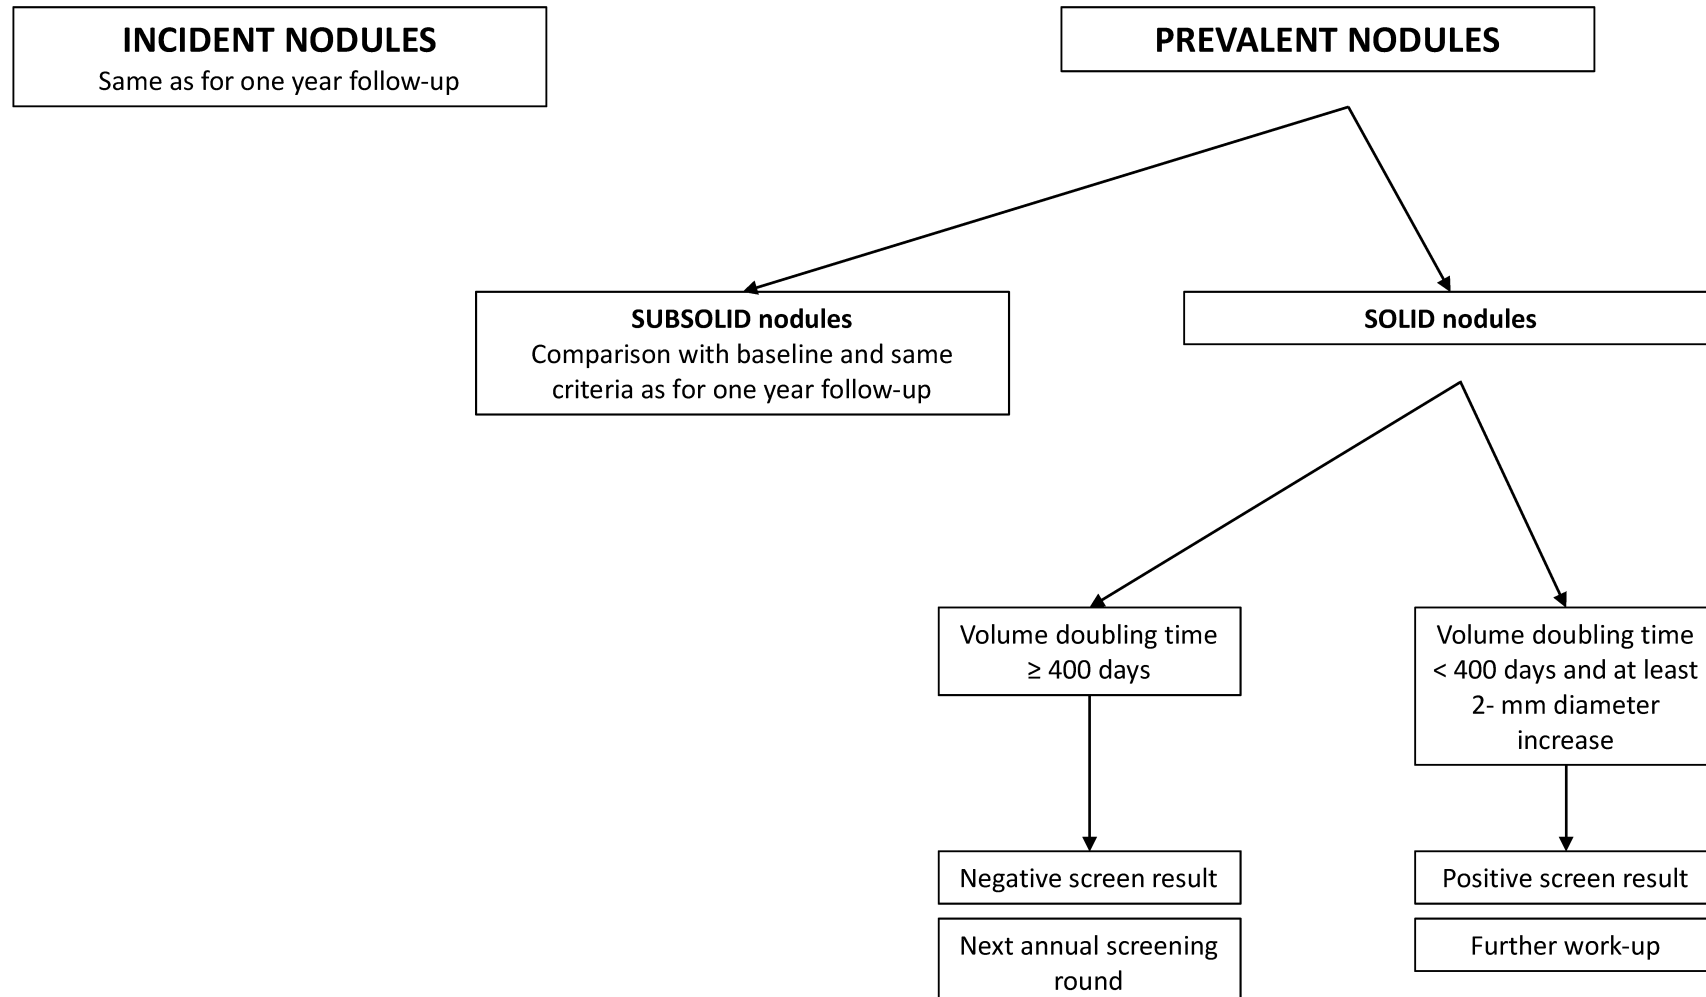

Supplement: bmjopen-2022-067263supp001.pdf [file bmjopen-2022-067263supp001.pdf]
